# Supplementary material for: Effect of Erythropoietin on Postresuscitation Renal Function in a Swine Model of Ventricular Fibrillation
Source: Hindawi journal article supplement (doi:10.1155/2016/3567275), 2016-01-01
Supplement: f1 [file 3567275.f1.pdf]

**Supplemental Table. Baseline data**

|             | Group C        | Group E        | p value |
|-------------|----------------|----------------|---------|
| SAoP (mmHg) | 112.34 ± 25.60 | 101.34 ± 15.64 | 0.176   |
| DAoP (mmHg) | 83.42 ± 19.39  | 81.45 ± 12.00  | 0.392   |
| MAoP (mmHg) | 93.06 ± 21.46  | 88.08±14.35    | 0.290   |
| CPP (mmHg)  | 75.23±9.86     | 73.54±8.77     | 0.362   |
| HR          | 122.2 ± 27.46  | 131.55 ± 46.5  | 0.630   |

SAoP = systolic arterial pressure, DAoP = diastolic arterial pressure,  
MAoP = mean arterial pressure, CPP = coronary perfusion pressure, HR=  
Heart rate
